# Supplementary material for: Single-cell tracking reveals super-spreading brain cancer cells with high persistence
Source: PubMed Central journal article supplement — Biochem Biophys Rep. 2021 Sep 9;28:101120. doi: 10.1016/j.bbrep.2021.101120 (PMC8435994; doi:10.1016/j.bbrep.2021.101120), 2021-09-09
Supplement: mmc1.pdf [file mmc1.pdf]

## Supplementary

# Single-cell tracking reveals super-spreading brain cancer cells with high persistence

Aimilia Nousi<sup>1,2</sup>, Maria Tangen Sogaard<sup>1</sup>, Mélanie Audoin<sup>1,2</sup>, and Liselotte Jauffred<sup>1,\*</sup>

<sup>1</sup>The Niels Bohr Institute, University of Copenhagen, Blegdamsvej 17, DK-2100 Copenhagen O, Denmark

<sup>2</sup>Present address: DTU Health Tech, Technical University of Denmark, Ørstedes Pl. 345B, 2800 Kgs. Lyngby, Denmark

\*Correspondence: jauffred@nbi.dk

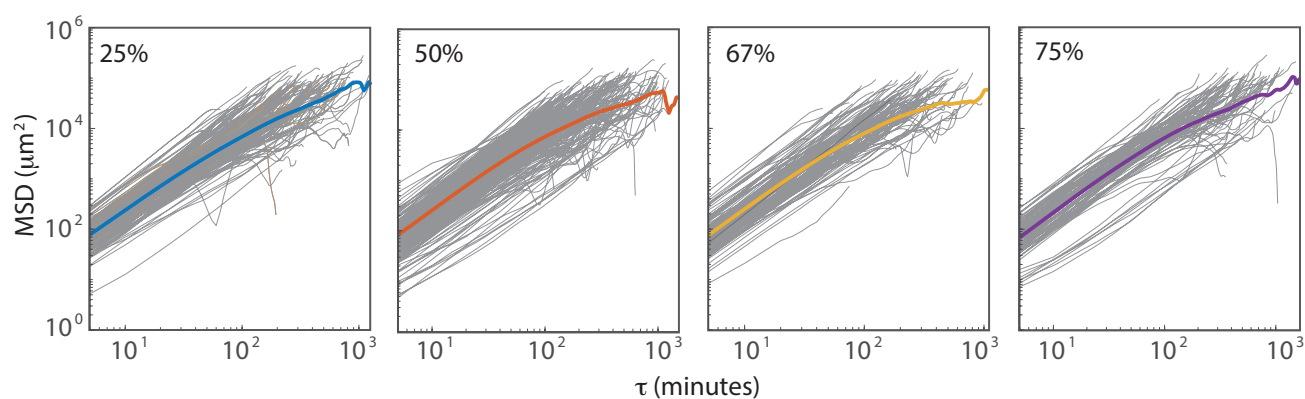

Figure S1: All mean-squared displacements of individual trajectories (light grey) and the mean MSD (thick colored line) at 25%, 50%, 67%, and 75% ECM concentration. The MSD is given in figure 2.

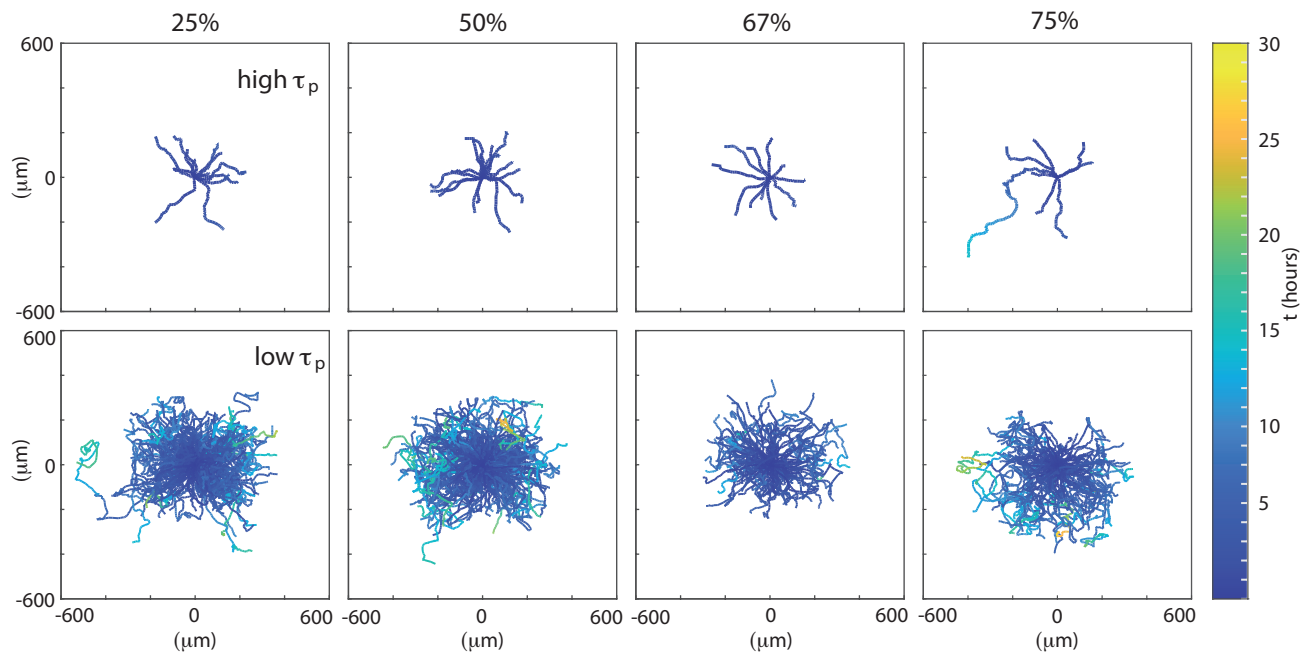

Figure S2: The entire set of trajectories for both high  $\tau_p$  (upper panel) and low  $\tau_p$  (lower panels) for 25%, 50%, 67%, and 75% ECM concentration, respectively. The redistribution of trajectories in respect to high/low  $\tau_p$  is done on the basis of figure 5.

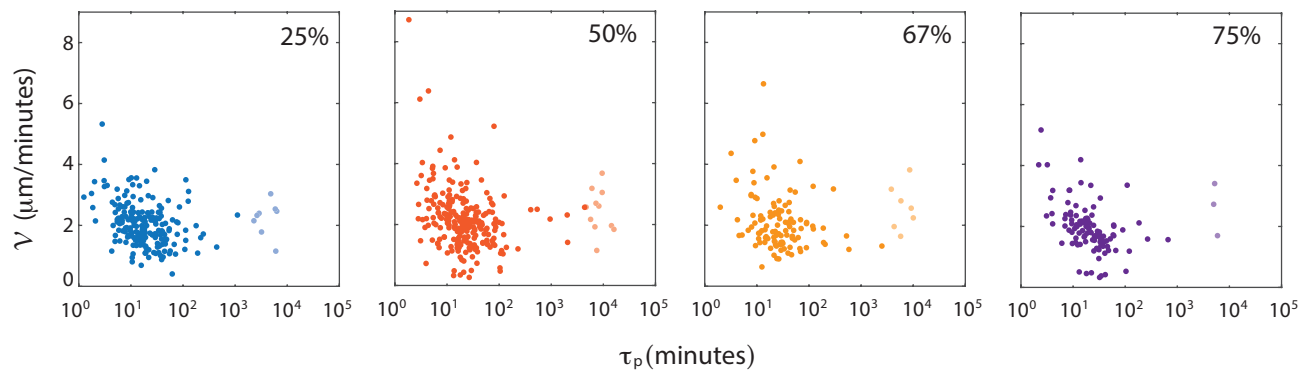

Figure S3: Scatter plots of average migration speeds,  $\mathcal{V}$  versus persistence times,  $\tau_p$  for 25% ( $N = 223$ ), 50% ( $N = 252$ ), 67% ( $N = 123$ ), and 75% ( $N = 108$ ) ECM. Using  $k$ -means clustering, we identified two distinct populations; one that is log-normal distributed around a lower  $\tau_p$  (full color) and one around a higher  $\tau_p$  (lighter color).
